# Supplementary material for: Dynamic projection of anthropogenic emissions in China: methodology and 2015–2050 emission pathways under a range of socioeconomic, climate policy, and pollution control scenarios
Source: Copernicus journal article supplement (doi:10.5194/acp-2019-1125), 2020-01-02
Supplement: Supplementary file 1 [file acp-2019-1125-supplement.pdf]

*Supplement of*

**Dynamic projection of anthropogenic emissions in China:  
methodology and 2015-2050 emission pathways under a range of  
5 socioeconomic, climate policy, and pollution control scenarios**

Dan Tong<sup>1</sup>, Jing Cheng<sup>1</sup>, Yang Liu<sup>1</sup>, Sha Yu<sup>2</sup>, Liu Yan<sup>1</sup>, Chaopeng Hong<sup>1</sup>, Yu Qin<sup>3</sup>, Hongyan Zhao<sup>1</sup>,  
Yixuan Zheng<sup>1</sup>, Guannan Geng<sup>3</sup>, Meng Li<sup>1</sup>, Fei Liu<sup>3</sup>, Yuxuan Zhang<sup>1</sup>, Bo Zheng<sup>3</sup>, Leon Clarke<sup>4</sup>, Qiang  
Zhang<sup>1</sup>

<sup>1</sup>Ministry of Education Key Laboratory for Earth System Modelling, Department of Earth System Science,  
10 Tsinghua University, Beijing 100084, People's Republic of China

<sup>2</sup>Joint Global Change Research Institute, Pacific Northwest National Laboratory, University Research Court,  
College Park, MD, 20742, USA

<sup>3</sup>State Key Joint Laboratory of Environment Simulation and Pollution Control, School of Environment, Tsinghua  
University, Beijing 100084, People's Republic of China

15 <sup>4</sup>Center for Global Sustainability, School of Public Policy, University of Maryland, College Park, MD, 20742,  
USA

*Correspondence to:* Qiang Zhang (qiangzhang@tsinghua.edu.cn)

## A technology-based turnover model

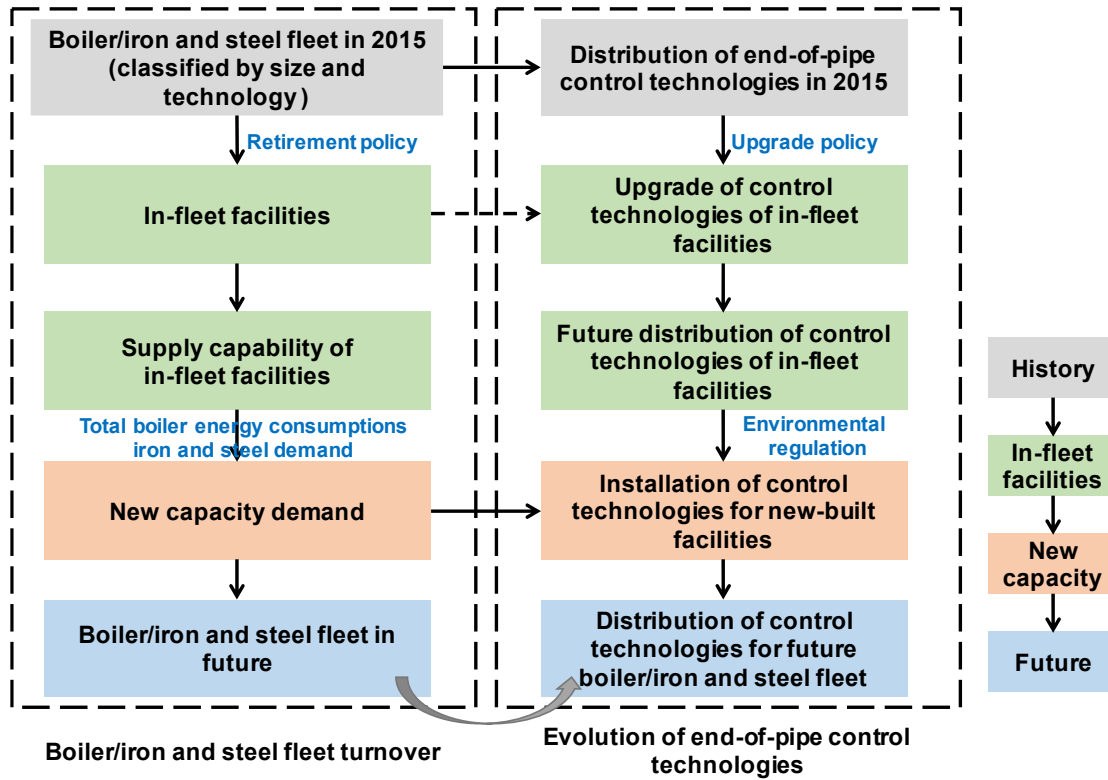

Figure S1: The framework of technology-based turnover emission projections model for coal-fired industrial boilers and iron and steel plants.

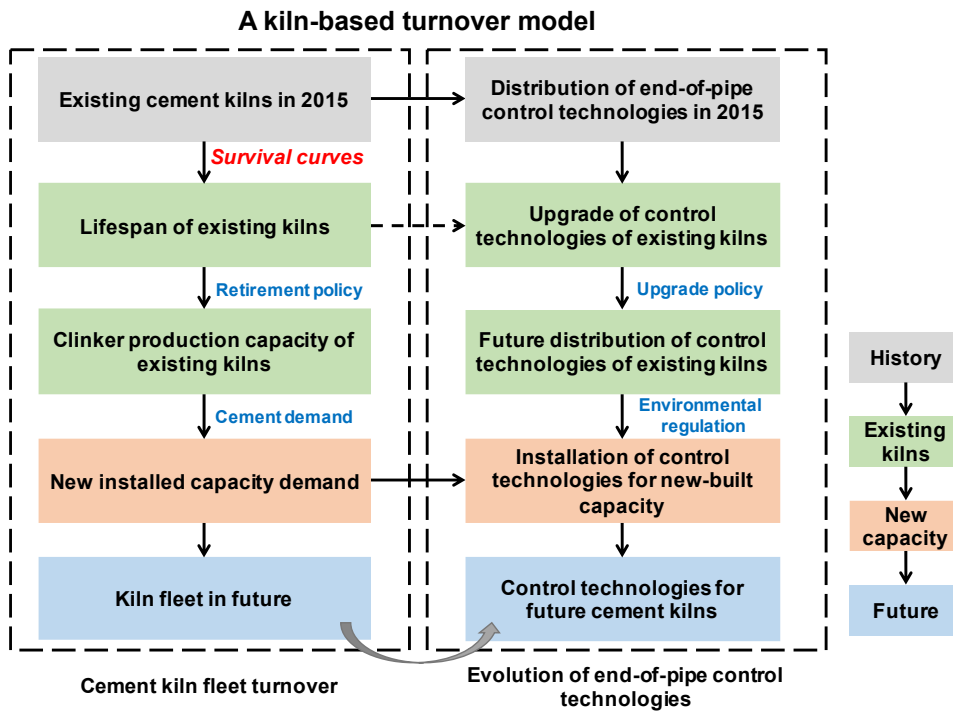

Figure S2: The framework of kiln-based turnover model for the cement industry.

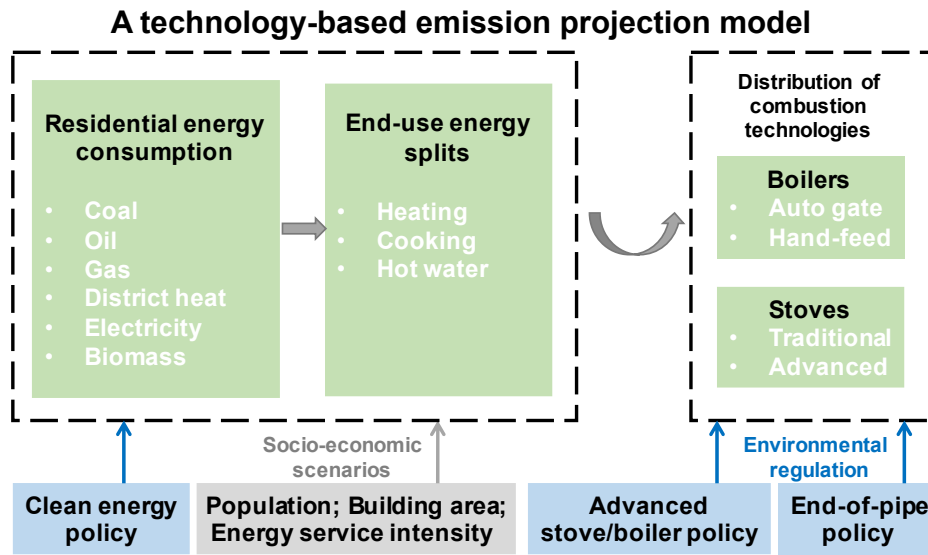

Figure S3: The framework of technology-based model for the residential sector.

## A vehicle fleet turnover model

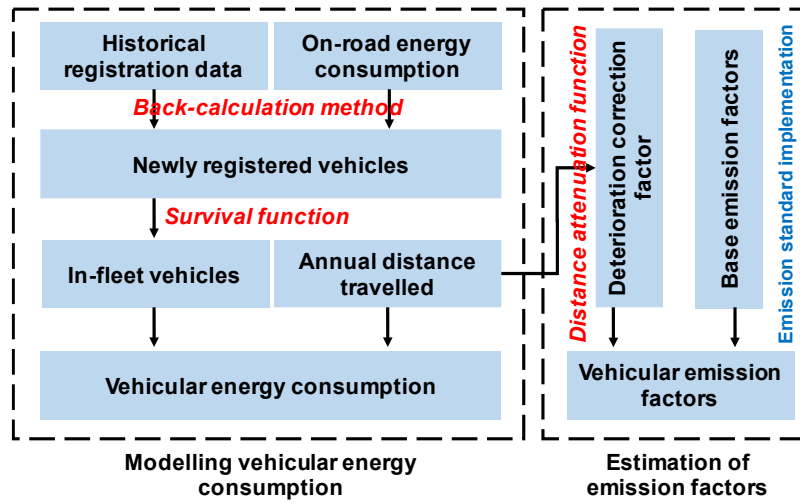

25

Figure S4: The framework of vehicle fleet turnover model for the on-road transportation.

| Emission source             | Scenario   | Region         | 2015     | 2016      | 2017      | 2018     | 2019     | 2020     | 2021       | 2022       | 2023       | 2024       | 2025     | ...      | 2030            | ... | 2034              | 2035            | ...        | 2040 | ... | 2046 | ... | 2050 |
|-----------------------------|------------|----------------|----------|-----------|-----------|----------|----------|----------|------------|------------|------------|------------|----------|----------|-----------------|-----|-------------------|-----------------|------------|------|-----|------|-----|------|
| Light-duty gasoline vehicle | BAU        | All region     | China 4  |           | China 5   |          |          |          |            |            |            |            |          |          |                 |     |                   |                 |            |      |     |      |     |      |
|                             | ECP        | BTH & FW Plain | China 4  |           | China 5   |          | China 6a |          |            | China 6b   |            |            |          |          |                 |     |                   |                 |            |      |     |      |     |      |
|                             |            | YRD            | China 4  |           | China 5   |          | China 6a |          |            | China 6b   |            |            |          |          |                 |     |                   |                 |            |      |     |      |     |      |
|                             |            | Other regions  | China 4  |           | China 5   |          |          | China 6a |            |            | China 6b   |            |          |          |                 |     |                   |                 |            |      |     |      |     |      |
| BHE                         | All region | China 4        |          | China 5   |           | China 6a |          |          | China 6b   |            |            |            |          |          | Assumed China 7 |     |                   |                 |            |      |     |      |     |      |
| Heavy-duty gasoline vehicle | BAU        | All region     | China 4  |           |           |          |          |          |            |            |            |            |          |          |                 |     |                   |                 |            |      |     |      |     |      |
|                             | ECP        | BTH & FW Plain | China 4  |           |           |          | China 5  |          |            | China 6a   |            |            | China 6b |          |                 |     |                   |                 |            |      |     |      |     |      |
|                             |            | YRD            | China 4  |           |           |          | China 5  |          |            | China 6a   |            |            | China 6b |          |                 |     |                   |                 |            |      |     |      |     |      |
|                             |            | Other regions  | China 4  |           |           |          |          | China 5  |            |            | China 6a   |            |          | China 6b |                 |     |                   |                 |            |      |     |      |     |      |
| BHE                         | All region | China 4        |          |           |           | China 5  |          |          | China 6a   |            |            | China 6b   |          |          |                 |     |                   | Assumed China 7 |            |      |     |      |     |      |
| Light-duty diesel vehicle   | BAU        | All region     | China IV |           |           | China V  |          |          |            |            |            |            |          |          |                 |     |                   |                 |            |      |     |      |     |      |
|                             | ECP        | BTH & FW Plain | China IV |           |           | China V  |          |          |            | China VI a |            | China VI b |          |          |                 |     |                   |                 |            |      |     |      |     |      |
|                             |            | YRD            | China IV |           |           | China V  |          |          |            | China VI a |            | China VI b |          |          |                 |     |                   |                 |            |      |     |      |     |      |
|                             |            | Other regions  | China IV |           |           | China V  |          |          |            | China VI a |            | China VI b |          |          |                 |     |                   |                 |            |      |     |      |     |      |
| BHE                         | All region | China IV       |          |           | China V   |          |          |          | China VI a |            | China VI b |            |          |          |                 |     | Assumed China VII |                 |            |      |     |      |     |      |
| Heavy-duty diesel vehicle   | BAU        | All region     | China IV |           |           | China 5  |          |          |            |            |            |            |          |          |                 |     |                   |                 |            |      |     |      |     |      |
|                             | ECP        | BTH & FW Plain | China IV |           |           | China V  |          |          |            | China VI a |            | China VI b |          |          |                 |     |                   |                 |            |      |     |      |     |      |
|                             |            | YRD            | China IV |           |           | China V  |          |          |            | China VI a |            | China VI b |          |          |                 |     |                   |                 |            |      |     |      |     |      |
|                             |            | Other regions  | China IV |           |           | China V  |          |          |            | China VI a |            | China VI b |          |          |                 |     |                   |                 |            |      |     |      |     |      |
| BHE                         | All region | China IV       |          |           | China V   |          |          |          | China VI a |            | China VI b |            |          |          |                 |     | Assumed China VII |                 |            |      |     |      |     |      |
| Off-road                    | BAU        | All region     | China II |           | China III |          |          |          |            |            |            |            |          |          |                 |     |                   |                 |            |      |     |      |     |      |
|                             | ECP        | BTH & FW Plain | China II |           | China III |          |          | China IV |            |            |            | China V    |          |          |                 |     |                   |                 |            |      |     |      |     |      |
|                             |            | YRD            | China II |           | China III |          |          | China IV |            |            |            | China V    |          |          |                 |     |                   |                 |            |      |     |      |     |      |
|                             |            | Other regions  | China II |           | China III |          |          | China IV |            |            |            | China V    |          |          |                 |     |                   |                 |            |      |     |      |     |      |
| BHE                         | All region | China II       |          | China III |           |          | China IV |          |            |            | China V    |            |          |          |                 |     | China VI a        |                 | China VI b |      |     |      |     |      |

**Figure S5: Policy evolution under each emission scenarios in the transportation sector during 2015-2050.** Policies in each emission source are strengthened in the order of blue, green, orange, yellow, and purple color.

| Source sector | Scenario | Region         | 2015                    | 2016                                                                                                  | 2017 | 2018                                                                                                         | 2019 | 2020 | 2021                         | ... | 2026                         | 2027 | 2028                         | ... | 2030                                           | ... | 2045 | ... | 2050 |
|---------------|----------|----------------|-------------------------|-------------------------------------------------------------------------------------------------------|------|--------------------------------------------------------------------------------------------------------------|------|------|------------------------------|-----|------------------------------|------|------------------------------|-----|------------------------------------------------|-----|------|-----|------|
| Residential   | BAU      | All region     | No specific regulations |                                                                                                       |      |                                                                                                              |      |      |                              |     |                              |      |                              |     |                                                |     |      |     |      |
|               | ECP      | BTH & FW Plain | no specific regulations | cleaner coals and stoves                                                                              |      | further reduce the ash and sulfur content in residential coal, and fully applied advanced stoves             |      |      | relative low emission levels |     |                              |      |                              |     |                                                |     |      |     |      |
|               |          | YRD            | no specific regulations | cleaner coals and stoves                                                                              |      | further reduce the ash and sulfur content in residential coal, and fully applied advanced stoves             |      |      |                              |     | relative low emission levels |      |                              |     |                                                |     |      |     |      |
|               |          | Other regions  | no specific regulations | cleaner coals and stoves                                                                              |      | further reduce the ash and sulfur content in residential coal, and fully applied advanced stoves             |      |      |                              |     |                              |      | relative low emission levels |     |                                                |     |      |     |      |
|               | BHE      | All region     | no specific regulations | cleaner coals and stoves                                                                              |      | further reduce the ash and sulfur content in residential coal, and fully applied advanced stoves             |      |      |                              |     | relative low emission levels |      |                              |     | Innovation of stoves and residential fuels     |     |      |     |      |
| Solvent use   | BAU      | All region     | No specific regulations |                                                                                                       |      |                                                                                                              |      |      |                              |     |                              |      |                              |     |                                                |     |      |     |      |
|               | ECP      | BTH & FW Plain | no specific regulations | lower the VOCs content                                                                                |      | further improve the water-soluble solvent use; install VOC control facility in coating and painting industry |      |      |                              |     | relative low emission levels |      |                              |     |                                                |     |      |     |      |
|               |          | YRD            | no specific regulations | lower the VOCs content                                                                                |      | further improve the water-soluble solvent use; install VOC control facility in coating and painting industry |      |      |                              |     | relative low emission levels |      |                              |     |                                                |     |      |     |      |
|               |          | Other regions  | no specific regulations | lower the VOCs content                                                                                |      | further improve the water-soluble solvent use; install VOC control facility in coating and painting industry |      |      |                              |     |                              |      | relative low emission levels |     |                                                |     |      |     |      |
|               | BHE      | All region     | no specific regulations | lower the VOCs content                                                                                |      | further improve the water-soluble solvent use; install VOC control facility in coating and painting industry |      |      |                              |     | relative low emission levels |      |                              |     | Innovation of solvent and VOC control facility |     |      |     |      |
| Agriculture   | BAU      | All region     | No specific regulations |                                                                                                       |      |                                                                                                              |      |      |                              |     |                              |      |                              |     |                                                |     |      |     |      |
|               | ECP      | BTH & FW Plain | no specific regulations | promote the use of organic fertilizer and the resource utilization of the poultry excrement and straw |      | enhance intensive cautiavation and grazierty; promote the slow-release fertilizer                            |      |      |                              |     | relative low emission levels |      |                              |     |                                                |     |      |     |      |
|               |          | YRD            | no specific regulations |                                                                                                       |      | enhance the intensive cautiavation and grazierty; promote the slow-release fertilizer                        |      |      |                              |     | relative low emission levels |      |                              |     |                                                |     |      |     |      |
|               |          | Other regions  | no specific regulations |                                                                                                       |      | enhance the intensive cautiavation and grazierty; promote the slow-release fertilizer                        |      |      |                              |     |                              |      | relative low emission levels |     |                                                |     |      |     |      |
|               | BHE      | All region     | no specific regulations |                                                                                                       |      | enhance the intensive cautiavation and grazierty; promote the slow-release fertilizer                        |      |      |                              |     | relative low emission levels |      |                              |     | Innovation of cautiavation and grazierty       |     |      |     |      |

30

**Figure S6: Policy evolution under each emission scenario in the residential, solvent use, and agriculture sectors during 2015-2050.** Policies in each emission source are strengthened in the order of blue, green, orange, and yellow color.

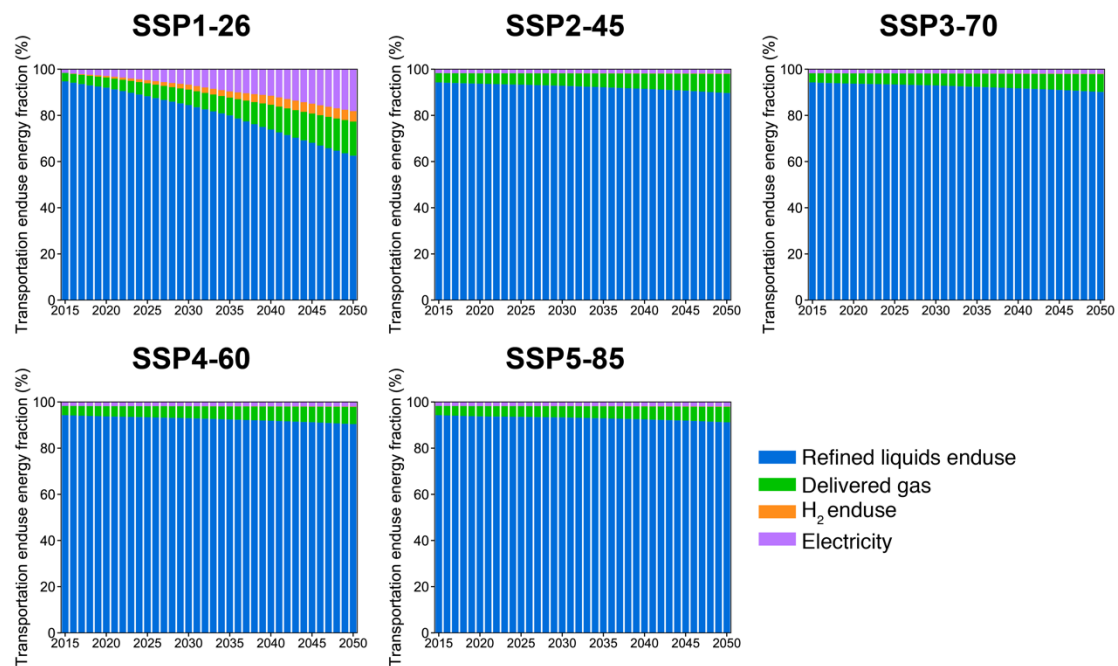

Figure S7: The evolution of future on-road transportation structure under each energy scenario during 2015-2050.



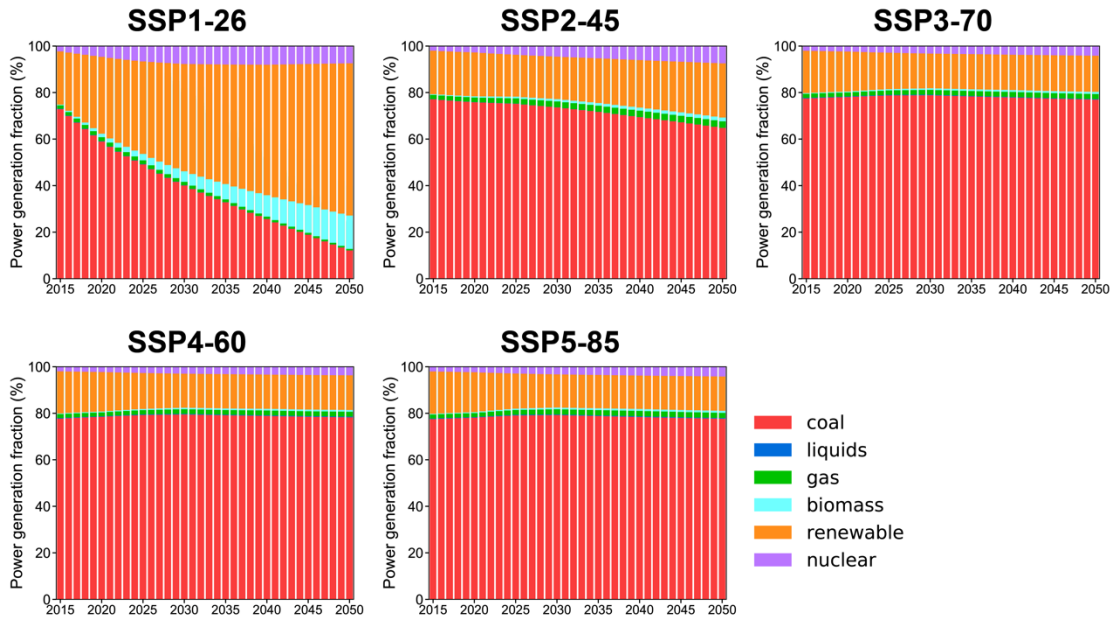

35

Figure S8: The evolution of future power structure under each energy scenario during 2015-2050.

**Table S1: The mapping table between the DPEC model and the GCAM-China model.**

| Activity rate of DPEC |                  |                                                                                              | Driving factors from GCAM-China |                                      |                            | Methods note                                                                                                     |
|-----------------------|------------------|----------------------------------------------------------------------------------------------|---------------------------------|--------------------------------------|----------------------------|------------------------------------------------------------------------------------------------------------------|
| Sector                | Subsector        | Fuel/production type                                                                         | Sector                          | Subsector                            | Fuel/production type       |                                                                                                                  |
| Power                 | Power generation | -                                                                                            | Electricity                     | Electricity generation by technology | -                          | Trend-adopted                                                                                                    |
|                       | Power fuel       | Raw coal<br>Cleaned coal<br>Other washed coal<br>Briquettes<br>Coke<br>Other coking products |                                 | Electricity fuel consumption         | Regional coal              | Distributed by the base-year proportion (heat values) of coal-related fuels (from power sector) in DPEC model    |
|                       |                  | Nature gas<br>Coke oven gas<br>Other gas                                                     |                                 |                                      | Wholesale gas              | Distributed by the base-year proportion (heat values) of gas-related fuels (from power sector) in DPEC model     |
|                       |                  | Crude oil<br>Gasoline<br>Kerosene<br>Diesel oil<br>Fuel oil<br>LPG<br>Refinery gas           |                                 |                                      | Refined liquids industrial | Distributed by the base-year proportion (heat values) of liquids-related fuels (from power sector) in DPEC model |

|         |                    | Other petroleum products                                                                                       |                                                         |                                                                                                                          |                                                                         |                                                                                                                                                                                            |
|---------|--------------------|----------------------------------------------------------------------------------------------------------------|---------------------------------------------------------|--------------------------------------------------------------------------------------------------------------------------|-------------------------------------------------------------------------|--------------------------------------------------------------------------------------------------------------------------------------------------------------------------------------------|
|         |                    | Biofuel                                                                                                        |                                                         |                                                                                                                          | Regional biomass                                                        | Trend-adopted                                                                                                                                                                              |
| Heating | Heating industrial | Raw coal<br>Cleaned coal<br>Other washed coal<br>Briquettes<br>Coke<br>Other coking products                   | Heat (national output);<br>Industry (provincial output) | Energy consumption of heat sector (national output);<br>Industry final energy by technology and fuel (provincial output) | Delivered coal (national output);<br>District heat (provincial output)  | Distributed by the base-year proportion (heat values) of coal-related fuels (from heating industrial sector) in DPEC model; downscaled to provincial level with district heat proportion   |
|         |                    | Nature gas<br>Coke oven gas<br><br>Other gas                                                                   |                                                         |                                                                                                                          | Wholesale gas (national output);<br>District heat (provincial output)   | Distributed by the base-year proportion (heat values) of gas-related fuels (from heating industrial sector) in DPEC model; downscaled to provincial level with district heat proportion    |
|         |                    | Crude oil<br>Gasoline<br>Kerosene<br>Diesel oil<br>Fuel oil<br>LPG<br>Refinery gas<br>Other petroleum products |                                                         |                                                                                                                          | Refined liquids (national output);<br>District heat (provincial output) | Distributed by the base-year proportion (heat values) of liquid-related fuels (from heating industrial sector) in DPEC model; downscaled to provincial level with district heat proportion |

|                     |  |                                                                                              |                                                      |                                                                                                                                                                     |                                                                        |                                                                                                                                                                                          |
|---------------------|--|----------------------------------------------------------------------------------------------|------------------------------------------------------|---------------------------------------------------------------------------------------------------------------------------------------------------------------------|------------------------------------------------------------------------|------------------------------------------------------------------------------------------------------------------------------------------------------------------------------------------|
|                     |  | Biofuel                                                                                      |                                                      |                                                                                                                                                                     | Delivered biomass (national output); District heat (provincial output) | Trend-adopted and downscaled to provincial level with district heat proportion                                                                                                           |
| Heating residential |  | Raw coal<br>Cleaned coal<br>Other washed coal<br>Briquettes<br>Coke<br>Other coking products | Heat (national output); Building (provincial output) | Energy consumption of heat sector (national output); Building final energy by service and fuel (commercial heating + residential urban heating) (provincial output) | Delivered coal (national output); District heat (provincial output)    | Distributed by the base-year proportion (heat values) of coal-related fuels (from heating industrial sector) in DPEC model; downscaled to provincial level with district heat proportion |
|                     |  | Nature gas<br>Coke oven gas<br><br>Other gas                                                 |                                                      |                                                                                                                                                                     | Wholesale gas (national output); District heat (provincial output)     | Distributed by the base-year proportion (heat values) of gas-related fuels (from heating industrial sector) in DPEC model; downscaled to provincial level with district heat proportion  |
|                     |  | Crude oil<br>Gasoline<br>Kerosene<br>Diesel oil<br>Fuel oil<br>LPG                           |                                                      |                                                                                                                                                                     | Refined liquids (national output); District heat (provincial output)   | Distributed by the base-year proportion (heat values) of liquid-related fuels (from heating industrial sector) in DPEC model; downscaled to provincial level with                        |

|             |                   |                                                                                              |          |                                                                                                                                                                 |                |                                                                                                                           |                                                                                                                              |
|-------------|-------------------|----------------------------------------------------------------------------------------------|----------|-----------------------------------------------------------------------------------------------------------------------------------------------------------------|----------------|---------------------------------------------------------------------------------------------------------------------------|------------------------------------------------------------------------------------------------------------------------------|
|             |                   | Refinery gas<br>Other petroleum products                                                     |          |                                                                                                                                                                 |                | district heat proportion                                                                                                  |                                                                                                                              |
|             |                   | biofuel                                                                                      |          |                                                                                                                                                                 |                | Delivered biomass (national output);<br>District heat (pro-vincial output)                                                | Trend-adopted and downscaled to provincial level with district heat proportion                                               |
| Residential | Residential urban | Raw coal<br>Cleaned coal<br>Other washed coal<br>Briquettes<br>Coke<br>Other coking products | Building | Building final energy by service and fuel (residential urban hot water cooking + commercial hot water cooking + commercial heating + residential urban heating) | Delivered coal | Distributed by the base-year proportion (heat values) of coal-related fuels (from residential urban sector) in DPEC model |                                                                                                                              |
|             |                   | Nature gas<br>Coke oven gas<br>Other gas                                                     |          |                                                                                                                                                                 |                | Delivered gas                                                                                                             | Distributed by the base-year proportion (heat values) of gas-related fuels (from residential urban sector) in DPEC model     |
|             |                   | Crude oil<br>Gasoline<br>Kerosene<br>Diesel oil<br>Fuel oil<br>LPG<br>Refinery gas           |          |                                                                                                                                                                 |                | Refined liquids enduse                                                                                                    | Distributed by the base-year proportion (heat values) of liquids-related fuels (from residential urban sector) in DPEC model |

|  |                       |                          |          |                                                                                                             |                        |                                                                                                                              |
|--|-----------------------|--------------------------|----------|-------------------------------------------------------------------------------------------------------------|------------------------|------------------------------------------------------------------------------------------------------------------------------|
|  |                       | Other petroleum products |          |                                                                                                             |                        |                                                                                                                              |
|  |                       | biofuel                  |          |                                                                                                             | Delivered biomass      |                                                                                                                              |
|  | Residential rural     | Raw coal                 | Building | Building final energy by service and fuel (residential rural hot water cooking + residential rural heating) | Delivered coal         | Distributed by the base-year proportion (heat values) of coal-related fuels (from residential rural sector) in DPEC model    |
|  |                       | Cleaned coal             |          |                                                                                                             |                        |                                                                                                                              |
|  |                       | Other washed coal        |          |                                                                                                             |                        |                                                                                                                              |
|  |                       | Briquettes               |          |                                                                                                             |                        |                                                                                                                              |
|  |                       | Coke                     |          |                                                                                                             |                        |                                                                                                                              |
|  | Other coking products |                          |          |                                                                                                             | Delivered gas          | Distributed by the base-year proportion (heat values) of gas-related fuels (from residential rural sector) in DPEC model     |
|  |                       | Nature gas               |          |                                                                                                             | Refined liquids enduse | Distributed by the base-year proportion (heat values) of liquids-related fuels (from residential rural sector) in DPEC model |
|  |                       | Coke oven gas            |          |                                                                                                             |                        |                                                                                                                              |
|  |                       | Other gas                |          |                                                                                                             |                        |                                                                                                                              |
|  |                       | Crude oil                |          |                                                                                                             |                        |                                                                                                                              |
|  |                       | Gasoline                 |          |                                                                                                             |                        |                                                                                                                              |
|  |                       | Kerosene                 |          |                                                                                                             | Traditional biomass    | Distributed by the base-year proportion (heat values) of biomass-related fuels                                               |
|  |                       | Diesel oil               |          |                                                                                                             |                        |                                                                                                                              |
|  |                       | Fuel oil                 |          |                                                                                                             |                        |                                                                                                                              |
|  |                       | LPG                      |          |                                                                                                             |                        |                                                                                                                              |
|  |                       | Refinery gas             |          |                                                                                                             |                        |                                                                                                                              |
|  |                       | Other petroleum products |          |                                                                                                             |                        |                                                                                                                              |
|  |                       | Wood                     |          |                                                                                                             |                        |                                                                                                                              |
|  |                       | Crop residual            |          |                                                                                                             |                        |                                                                                                                              |

|                       |                    |                                                                                                                |          |                                                                                                                |                        |                                                                                                                              |
|-----------------------|--------------------|----------------------------------------------------------------------------------------------------------------|----------|----------------------------------------------------------------------------------------------------------------|------------------------|------------------------------------------------------------------------------------------------------------------------------|
|                       |                    |                                                                                                                |          |                                                                                                                |                        | (from residential rural sector) in DPEC model                                                                                |
| Industrial combustion | Industrial boilers | Raw coal<br>Cleaned coal<br>Other washed coal<br>Briquettes<br>Coke<br>Other coking products                   | Industry | Industrial energy use<br>(minus the industrial kilns coal use and off-road transportation energy consumptions) | Delivered coal         | Distributed by the base-year proportion (heat values) of coal-related fuels (from industrial boiler sector) in DPEC model    |
|                       |                    | Nature gas<br>Coke oven gas<br><br>Other gas                                                                   |          |                                                                                                                | Wholesale gas          | Distributed by the base-year proportion (heat values) of gas-related fuels (from industrial boiler sector) in DPEC model     |
|                       |                    | Crude oil<br>Gasoline<br>Kerosene<br>Diesel oil<br>Fuel oil<br>LPG<br>Refinery gas<br>Other petroleum products |          |                                                                                                                | Refined liquids enduse | Distributed by the base-year proportion (heat values) of liquids-related fuels (from industrial boiler sector) in DPEC model |
|                       |                    | biofuel                                                                                                        |          |                                                                                                                | Delivered biomass      | Trend-adopted                                                                                                                |
|                       | Industrial kilns   | Cement coal use                                                                                                | Industry | Inputs to cement production                                                                                    | Delivered coal         | Trend-adopted                                                                                                                |
|                       |                    | Lime coal use                                                                                                  |          | 1) Projected cement coal use (GCMA-China)                                                                      |                        | Regression model                                                                                                             |

|                |                                   |                                                                                         |                         |                                                                                                                                                         |                                     |                        |
|----------------|-----------------------------------|-----------------------------------------------------------------------------------------|-------------------------|---------------------------------------------------------------------------------------------------------------------------------------------------------|-------------------------------------|------------------------|
|                |                                   |                                                                                         |                         | 2) Historical lime coal use (DPEC)                                                                                                                      |                                     |                        |
|                |                                   | Brick coal use                                                                          |                         | 1) Projected cement coal use (GCMA-China)<br>2) Historical brick coal use (DPEC)                                                                        | Regression model                    |                        |
|                | Energy-related industrial process | Sinter (Capacity)                                                                       |                         | 1) Projected industry final energy use (GCMA-China)<br>2) Projected sinter production (DPEC)<br>3) Historical sinter furnace energy structures (DPEC)   | Multivariate equation               |                        |
|                |                                   | Iron (Capacity)                                                                         |                         | 1) Projected industry final energy use (GCMA-China)<br>2) Projected iron production (DPEC)<br>3) Historical sinter furnace energy structures (DPEC)     | Multivariate equation               |                        |
|                |                                   | Steel (Capacity)                                                                        |                         | 1) Projected industry final energy use (GCMA-China)<br>2) Projected steel production (DPEC)<br>3) Historical sinter furnace energy structures (DPEC)    | Multivariate equation               |                        |
|                |                                   | Petrochemical Industry (crude oil production, crude oil handle, oil depot, oil station) | Socioeconomics, General | 1) Projected oil consumption (GCAM-China)<br>2) GDP per capita at market exchange rates (MER) by region (GCAM-China)<br>3) Historical production (DPEC) | Regression model                    |                        |
| Transportation |                                   | On-road                                                                                 | Vehicles gasoline use   | Transportation                                                                                                                                          | Transportation final energy by fuel | Refined liquids enduse |
|                | Vehicles diesel oil use           |                                                                                         |                         |                                                                                                                                                         |                                     |                        |
|                | Vehicles nature gas use           |                                                                                         | Delivered gas           |                                                                                                                                                         |                                     | Trend-adopted          |



|  |          |                          |                             |                                                                                                                                  |                        |               |
|--|----------|--------------------------|-----------------------------|----------------------------------------------------------------------------------------------------------------------------------|------------------------|---------------|
|  |          | Vehicles electricity use |                             |                                                                                                                                  | Electricity            | Trend-adopted |
|  | Off-road | Machines diesel oil use  | Transportation and Industry | 1) Projected transportation final energy by fuel (GCMA-China)<br>2) Historical on/off-road energy consumption split ratio (DPEC) | Refined liquids enduse | Trend-adopted |
|  |          | Machines nature gas use  |                             |                                                                                                                                  | Delivered gas          | Trend-adopted |
|  |          | Machines electricity use |                             |                                                                                                                                  | Electricity            | Trend-adopted |

**Table S2: The description of sector-based emission projection models in the DPEC.**

| <b>DPEC model sector</b>  | <b>Subsector</b>                                                                                                                                                                                                                              | <b>Model description</b>        |
|---------------------------|-----------------------------------------------------------------------------------------------------------------------------------------------------------------------------------------------------------------------------------------------|---------------------------------|
| Energy supply             | Coal-fired power plants                                                                                                                                                                                                                       | Technology-based turnover model |
|                           | Other-fuel-fired power plants                                                                                                                                                                                                                 | Technology-based model          |
|                           | Heating plants                                                                                                                                                                                                                                | Technology-based model          |
| Industrial combustion     | Coal-fired industrial boilers and kilns                                                                                                                                                                                                       | Technology-based turnover model |
|                           | Other-fuel combustion                                                                                                                                                                                                                         | Technology-based model          |
| Industrial non-combustion | Coke, iron, and steel plants                                                                                                                                                                                                                  | Technology-based turnover model |
|                           | Cement plants                                                                                                                                                                                                                                 |                                 |
|                           | Other metals and non-metals (all other metal products, non-ferrous metals, non-metal building materials, and other industrial products)                                                                                                       | Technology-based model          |
|                           | Petrochemical industry (oil and gas production, distribution and refinery; fertilizer production; solvent production; synthetic materials; and other chemical products)                                                                       |                                 |
| Transportation            | On-road (four types of passenger vehicles: heavy-duty buses, medium-duty buses, light-duty buses, and minibuses; and four types of trucks: heavy-duty trucks, medium-duty trucks, light-duty trucks, and mini trucks; as well as motorcycles) | Technology-based turnover model |
|                           | Off-road (agriculture machinery, construction machinery, low-speed truck, 3-wheelers, locomotive, and in-land waterway)                                                                                                                       | Technology-based model          |
| Residential               | /                                                                                                                                                                                                                                             | Technology-based model          |
| Solvent use               | Paint use, printing use, pharmaceutical production, vehicle treatment, wood production, pesticide use, and household solvent use                                                                                                              |                                 |
| Agriculture               | Fertilizer use and livestock                                                                                                                                                                                                                  |                                 |

**Table S3: The projection methods of non-energy related activity rates.**

| Activity rate of DPEC     |                             |                                                                                                                                                      | Driving factors |           |                                                                                    | Methods note                                                            |
|---------------------------|-----------------------------|------------------------------------------------------------------------------------------------------------------------------------------------------|-----------------|-----------|------------------------------------------------------------------------------------|-------------------------------------------------------------------------|
| Sector                    | Subsector                   | Fuel/production type                                                                                                                                 | Sector          | Subsector | Fuel/production type                                                               |                                                                         |
| Industrial non-combustion | Coke, iron, and steel       | Sinter (production)                                                                                                                                  | -               |           | Driven by GDP with a Resilience factor law                                         | Elastic coefficient method                                              |
|                           |                             | Iron (production)                                                                                                                                    |                 |           |                                                                                    |                                                                         |
|                           |                             | Steel (production)                                                                                                                                   |                 |           |                                                                                    |                                                                         |
|                           |                             | Coke                                                                                                                                                 |                 |           |                                                                                    |                                                                         |
|                           | Cement                      | Cement                                                                                                                                               | Industry        |           | Cement production by region (GCAM-China)                                           | Trend-adopted                                                           |
|                           | Other metals and non-metals | Other metal products (foundry products)                                                                                                              | -               |           | 1) Projected steel production (DPEC)<br>2) Historical production (DPEC)            | Regression model:<br>From the activity levels of above steel production |
|                           |                             | Non-ferrous metals (aluminum, copper, zinc, alumina, and other non-ferrous metal)                                                                    | Socioeconomics  |           | 1) GDP at MER by region (GCAM-China)<br>2) Historical production (DPEC)            | Regression model:<br>Line regression                                    |
|                           |                             | Glass (flat glass and glass products)                                                                                                                | Building        |           | 1) New building area (GCAM-China)<br>2) Historical production (DPEC)               | Regression model:<br>From the activity levels of new building area      |
|                           |                             | lime and brick                                                                                                                                       |                 |           | Projected cement production (GCAM-China)                                           | Trend-adopted                                                           |
|                           |                             | Food and drink industry (i.e. bread, cake, biscuit, sugar, beer, wine, and spirits), textile industry (i.e. wool, silk, cloth, and synthetic fiber). | Socioeconomics  |           | 1) GDP per capita at MER by region (GCAM-China)<br>2) Historical production (DPEC) | Regression model:<br>Line regression                                    |

|             |                        |                                                                                                                                                                                                                            |                |                                                                    |                                                                   |
|-------------|------------------------|----------------------------------------------------------------------------------------------------------------------------------------------------------------------------------------------------------------------------|----------------|--------------------------------------------------------------------|-------------------------------------------------------------------|
|             | Petrochemical industry | Fertilizer production(urea, ammonium bicarbonate, other nitrate fertilizers, and NPK fertilizer )                                                                                                                          | Socioeconomics | 1) Fertilizer consumption (DPEC)                                   | Trend-adopted                                                     |
|             |                        | Solvent production (varnish paint, architecture paint, printing ink, and glue production)                                                                                                                                  |                | 2) Corresponding solvent use (DPEC)                                | Trend-adopted                                                     |
|             |                        | Synthetic materials (polyvinyl chloride (PVC) products, polystyrene, ethylene, low-density polyethylene (LDPE), high-density polyethylene (HDPE), styrene, polystyrene, vinyl chloride, PVC, propylene, and polypropylene) | Socioeconomics | 1) National GDP (GCAM-China)<br>2) Historical production (DPEC)    | Regression model:<br>Line regression                              |
|             |                        | Other chemical products (carbon black, sulfuric acid, synthetic ammonia by coal, pulp and asphalt production)                                                                                                              | Socioeconomics | 1) National GDP (GCAM-China)<br>2) Historical production (DPEC)    | Regression model:<br>Line regression                              |
|             |                        | Other chemical products (Rubber, and tyres)                                                                                                                                                                                |                | 1) Newly registered vehicles (GCAM-China)                          | Trend-adopted                                                     |
| Solvent use | Paint use              | Architecture interior wall coating                                                                                                                                                                                         | Building       | 1) Newly-built area (GCAM-China)<br>2) Historical paint use (DPEC) | Regression model:<br>From the activity levels of newly-built area |
|             |                        | Architecture other paint                                                                                                                                                                                                   |                |                                                                    |                                                                   |
|             |                        | Decorations wood                                                                                                                                                                                                           |                |                                                                    |                                                                   |
|             |                        | Wood furniture                                                                                                                                                                                                             |                |                                                                    |                                                                   |

|                       |                           |                                    |                                                                              |                                                                              |                                                                            |
|-----------------------|---------------------------|------------------------------------|------------------------------------------------------------------------------|------------------------------------------------------------------------------|----------------------------------------------------------------------------|
|                       |                           | New car varnish paint              | Transportation                                                               | 1) Newly registered vehicles (GCAM-China)<br>2) Historical paint use (DPEC)  | Regression model:<br>From the activity levels of newly registered vehicles |
|                       |                           | Vehicle refurnish paint            |                                                                              | 1) Total vehicles (DPEC)<br>2) Historical paint use (DPEC)                   | Regression model:<br>From the activity levels of total vehicles            |
|                       |                           | Other industrial coatings          |                                                                              | Projected according to the annual growth rate of above paint use             | Regression model:<br>From the activity levels of above paint use           |
|                       | Printing use              | Printing ink                       | Socioeconomics                                                               | 1) National GDP (GCAM-China)<br>2) Historical paint use (DPEC)               | Regression model:<br>Line regression                                       |
|                       |                           | Printing cleaning gasoline solvent |                                                                              |                                                                              |                                                                            |
|                       | Pharmaceutical production | Pharmaceutical production          |                                                                              |                                                                              |                                                                            |
|                       | Wood Production Treated   | Wood Production Treated            |                                                                              |                                                                              |                                                                            |
|                       | Vehicle treatment         | Passenger vehicle treated-dewax    | Transportation                                                               | 1) Newly registered vehicles (GCAM-China)<br>2) Historical paint use (DPEC)  | Regression model:<br>From the activity levels of newly registered vehicles |
|                       |                           | Passenger vehicle treated-reseal   |                                                                              |                                                                              |                                                                            |
|                       | Pesticide use             | Pesticide use                      | Socioeconomics                                                               | 1) Projected population (GCAM-China)<br>2) Historical pesticide usage (DPEC) | Regression model:<br>Line regression                                       |
| Household solvent use | Domestic solvent          | Socioeconomics                     | 1) GDP per capita at MER by region (GCAM-China)<br>2) Historical solvent use | Regression model:<br>Line regression                                         |                                                                            |

|             |                        |                                                                                                       |                |                                                                                                                                                                                                                     |                                      |
|-------------|------------------------|-------------------------------------------------------------------------------------------------------|----------------|---------------------------------------------------------------------------------------------------------------------------------------------------------------------------------------------------------------------|--------------------------------------|
|             |                        | Glue use                                                                                              |                | (DPEC)                                                                                                                                                                                                              |                                      |
|             |                        | Dry clean use                                                                                         | Socioeconomics | 1) Urban GDP per capita at MER by region (GCAM-China)<br>2) Historical domestic dry clean solvent use (DPEC)                                                                                                        | Regression model:<br>Line regression |
| Agriculture | Livestock              | Dairy cattle, other cattle, horse, donkey, mule, pig, goat, sheep, broiler, laying hen, other poultry | Socioeconomics | 1) Projected population (GCAM-China)<br>2) Historical amount (DPEC)                                                                                                                                                 | Regression model:<br>Line regression |
|             | Fertilizer application | Urea, ammonium bicarbonate, other N fertilizers, NPK                                                  | Socioeconomics | Regression model:<br>1) Historical fertilizer application (DPEC)<br>2) National crop yield<br>3) The future national crop yield is estimated using the product of per capita crop yield and population (GCAM-China) | Regression model:<br>Line regression |

**Table S4: The sector mapping between the DPEC model and the CMIP6 database.**

| <b>DPEC model sector</b>         | <b>CMIP6 database sector</b>           |
|----------------------------------|----------------------------------------|
| Power, heating industrial        | Energy sector                          |
| Industry                         | Industrial sector, peat burning, waste |
| Residential, heating residential | Residential commercial other           |
| Transportation                   | Transportation sector                  |
| Solvent use                      | Solvents production and application    |
| Agriculture                      | Agriculture                            |
